# Supplementary material for: PTPN11-related Noonan syndrome predisposes to multifocal low-grade CNS tumors harboring FGFR1 variants
Source: J Neurooncol. 2026 Mar 5;177(1):31. doi: 10.1007/s11060-026-05478-7 (PMC12963110; doi:10.1007/s11060-026-05478-7)
Supplement: Supplementary file 1 — Supplementary Material 1 [file 11060_2026_5478_MOESM1_ESM.xlsx]

## Sheet: Sheet1
RASopathy Gene List
Disorder or Syndrome	Gene
Autism	ERK1
Cardiofaciocutaneous	KRAS
	BRAF
	MEK1
	MEK2
CM-AVM	RASA1
Coffin-Lowry	RSK2
Costello	HRAS
DiGeorge	TBX1
	FGF8
	CRKL
	ERK2
	SMARCB1
	Chr. 22q11 Del.
Gingival Fibromatosis	SOS1
Legius	SPRED1
LEOPARD or Noonan syndrome with multiple lentigines	PTPN11
	RAF1
	BRAF
	MEK1
Neurofibromatosis type 1	NF1
Noonan	PTPN11
	CBL
	BRAF
	KRAS
	LZTR1
	MEK1
	NRAS
	RIT1
	SOS1
	SOS2
	SHOC2
Additional Glioma Genes
	FGFR1-4
	ALK
	ROS1
	NTRK1-3
	PDGFRA
	MET
	MYB
	MYBL1
	MYCN
	TP53
	MAP2K1
	H3F3A
	HIST1H3B/C
	IDH1/2
	PIK3CA
	PIK3R1
	ATRX
	DAXX
	EGFR
	ACVR1B/C
	PPM1D
	CDKN2A Del.
	Chr. 1p Del.
	Chr. 1p/19q Del.
Abbreviations: CM-AVM, capillary malformation-arteriovenous malformation; Chr, chromosome; Del, deletion
