# Supplementary material for: PTPN11-related Noonan syndrome predisposes to multifocal low-grade CNS tumors harboring FGFR1 variants
Source: J Neurooncol. 2026 Mar 5;177(1):31. doi: 10.1007/s11060-026-05478-7 (PMC12963110; doi:10.1007/s11060-026-05478-7)
Supplement: Supplementary file 2 — Supplementary Material 2 [file 11060_2026_5478_MOESM2_ESM.xlsx]

## Sheet: Sheet1
	Primary tumor site	Additional Tumor (sites)	Radiological Progressive Multifocal Tumors/Interval (years) b	Metastatic Spread	Radiological Progression	Other Features
1	Cerebellum	No	N/A	YES, brain and spine at diagnosis	YES (local and metastatic)	No
a 2	Temporal lobe	No	N/A	No	No	Intra-tumoral hematoma and intra-ventricular hemorrhage at diagnosis
3	Midbrain	No	N/A	No	Unknown	No
4	Midbrain	YES, small lesion in cerebellum	YES/2.5	No	YES (local in primary and multifocal site)	FLAIR ring sign in midbrain lesion
5	Frontal lobe	YES, multiple, including one large lesion in left temporal lobe, right temporal lobe, and one in cerebellum	YES/20.2	No (spine MRI not done)	YES (local in multifocal sites)	No
6	Temporal lobe	No	N/A	No (spine MRI not done)	No	No
7	Frontal lobe	YES, 4 small lesions in cerebral cortex, thalami, and cerebellar peduncle	YES/4.6	No	YES (local in multifocal sites)	No
8	Optic nerve and chiasm	YES, 4 small lesions in cerebellum and cerebral cortex	YES/7.3	No (spine MRI not done)	YES (local in primary and multifocal sites)	No
9	Temporal lobe	YES, separate lesion in cerebellum	No/10.2	YES, brain at progression	YES (local primary site and metastatic)	Cerebellar lesion with typical aspect of DNET, including FLAIR ring sign
10	Cerebellum	YES, at least 4 small lesions in pons, thalamus, and cerebral cortex	YES/6.4	No (spine MRI not done)	YES (local in primary and multifocal sites)	Hemorrhagic blood level in cerebellar lesion at diagnosis
a 11	Thalamus	No	N/A	No	YES (local)	No
a 12	Midbrain	No	N/A	No	YES (local)	No
13	Temporal lobe	YES, 4 small lesions in cerebral cortex, thalamus, and cerebellum	YES/6.8	No (spine MRI not done)	YES (local in mulltifocal site)	No
14	Temporal lobe and cerebellum	YES, large lesion in cerebellum	Histologically confirmed/8.9	No details	YES (local in primary and multifocal sites)	Hemorrhagic cerebellar tumor at diagnosis and at progression
15	Temporal lobe	YES, at least 3 separate lesions in cerebellum, thalamus, and cerebral cortex	Histologically confirmed/7	No (spine MRI not done)	YES (local in primary and multifocal sites)	Hemorrhagic blood level in cerebellar lesion at progression
16	Optic nerve and chiasm	No	N/A	YES, brain at diagnosis	YES (sites unknown)	No
17	Hypothalamus	No	N/A	YES, brain at progression	YES (sites unknown)	Intra-tumoral and massive intra-ventricular hemorrhage at diagnosis
18	Cerebellopontine angle	No	N/A	No	No	No
19	Pons and medulla	No	N/A	No	No	Elevated choline and decreased NAA by MRS
20	Hypothalamus	No	N/A	No	YES (local)	No
21	Cerebellar peduncle	YES, multiple separete lesions in cerebellum	No/0.6	No	No	Elevated choline and decreased NAA by MRS
22	Cerebellum	YES, one small lesion in putamen	YES/9.6	No (spine MRI not done)	YES (putamen)	No
a 23	Spinal cord	No	N/A	YES, brain and spine at diagnosis	YES (sites unknown)	No
24	Temporal Lobe	YES, multiple lesions in thalamus and cereberal cortex	YES/3.8	YES, brain at diagnosis	YES (metastatic)	Heavily calcified tumors by CT
Abbreviations: DNET, dysembryoplastic neuroepithelial tumor; FLAIR, fluid-attenuated inversion recovery; MRS, magnetic resonance spectroscopy; NAA, N-acetylaspartate
a Subjects with only imaging obtained at diagnosis available for review; b Only applicable to satellite, non-histologically-confirmed tumors in cases with multifocal disease
