# Supplementary material for: PTPN11-related Noonan syndrome predisposes to multifocal low-grade CNS tumors harboring FGFR1 variants
Source: J Neurooncol. 2026 Mar 5;177(1):31. doi: 10.1007/s11060-026-05478-7 (PMC12963110; doi:10.1007/s11060-026-05478-7)
Supplement: Supplementary file 3 — Supplementary Material 3 [file 11060_2026_5478_MOESM3_ESM.xlsx]

## Sheet: Sheet1
Patient	Methylation V11 Classification	V11 Calibrated Score	Methylation V12 Classification	V12 Calibrated Score	Methylation Copy Number
1	Control tissue, cerebellar hemisphere	0.99738	Control tissue, cerebellum	0.99967	Normal
3	Diffuse midline glioma H3 K27M mutant	0.33251	Diffuse midline glioma, histone 3 K27-mutant	0.8714	Chr 1q, 3 Gain. CDK4/MDM2 amplification
6	Unclassified	N/A	Control tissue, reactive tumor microenvironment	0.97173	Normal
7	Control tissue, hemispheric cortex	0.67721	Dysembryoplastic neuroepithelial tumor	0.99533	Normal
8	Control tissue, reactive tumor microenvironment	0.51593	Control tissue, reactive tumor microenvironment	0.93286	Normal
9	Low-grade glioma, dysembryoplastic neuroepithelial tumor	0.88994	Dysembryoplastic neuroepithelial tumor	0.99726	Normal
11	Unclassified	N/A	Control tissue, reactive tumor microenvironment	0.98092	Normal
12	Control tissue, reactive tumor microenvironment	0.30269	Unclassified	N/A	Normal
13	Low-grade glioma, dysembryoplastic neuroepithelial tumor	0.98242	Dysembryoplastic neuroepithelial tumor	0.99726	Normal
14	Low-grade glioma, subclass posterior fossa pilocytic astrocytoma	0.44181	Low-grade glioma, pilocytic astrocytoma subtype, infratentorial, subclass FGFR1-altered	0.99613	Normal
	Low-grade glioma, dysembryoplastic neuroepithelial tumor	0.99706	Dysembryoplastic neuroepithelial tumor	0.87436	Normal
15	Low-grade glioma, dysembryoplastic neuroepithelial tumor	0.78771	Dysembryoplastic neuroepithelial tumor	0.99095	Chr 16, 17, 19, 22 loss (noisy)
	Control tissue, cerebellar hemisphere	0.99304	Control tissue, cerebellum	0.99210	Normal (noisy)
18	Plexus tumor, subclass pediatric B	0.56806	Schwannoma	0.5494	Normal
23	Control tissue, inflammatory tumor microenvironment	0.9271	Langerhans cell histiocytosis	0.95317	Normal
24	Low-grade glioma, rosette-forming glioneuronal tumor	0.99873	Rosette-forming glioneuronal tumor	0.71584	Chr. 6, 8, 10 gain
