# Supplementary material for: PTPN11-related Noonan syndrome predisposes to multifocal low-grade CNS tumors harboring FGFR1 variants
Source: J Neurooncol. 2026 Mar 5;177(1):31. doi: 10.1007/s11060-026-05478-7 (PMC12963110; doi:10.1007/s11060-026-05478-7)
Supplement: Supplementary file 4 — Supplementary Material 4 [file 11060_2026_5478_MOESM4_ESM.xlsx]

## Sheet: Sheet1
Patient	Age at Diagnosis (years)/Gender	Histological Diagnosis	Tumor Location	Concomitant Clinical Characteristics	Clinical Diagnosis	Germline Data	Publication
1	16/M	Pilocytic astrocytoma	Cervicomedullary	Syndromic features and chest deformity	Noonan syndrome	NA	Sanford et al. (1999)
2	18/F	Low-grade glioma	Hypothalamus	Developmental delay, short stature, syndromic features, cardiopathy, and multiple nevi	Noonan syndrome	PTPN11 c.417G>C p.Glu139Asp	Jongmans et al. (2004)
3	24/NA	Oligodendroglioma WHO grade 2	NA	Absence of clinical abnortmalities	Noonan syndrome	PTPN11 c.64A>G p.Thr22Ala	Martinelli et al. (2006)
4	11/F	Pilocytic astrocytoma	Sellar area	Developmental delay, short stature, syndromic features, cardiopathy, and bleeding diathesis	Noonan syndrome	NA	Fryssira et al. (2008)
5	8/M	Pilocytic astrocytoma	Sellar and suprasellar area	Delayed speech, hearing loss, syndromic features, and cardiopathy	Noonan syndrome	PTPN11 c.1471_1472delinsTT p.Phe491Pro	Schuettpelz et al. (2009)
6	6/M	Metastatic low-grade glioneuronal tumor	Hypothalamus	Developmental delay, syndromic features, cardiopathy, chest deformity	Noonan syndrome	PTPN11 c.174A>G p.Asn58Asp	Sherman et al. (2009)
7	18/M	Rosette-forming glioneuronal tumor	Fourth ventricle	Developmental delay, cardiopathy, and affected first degree relative	Noonan syndrome	NA	Karafin et al. (2011)
8	10/M	Medulloblastoma	Cerebellum	Developmental delay, chest deformity, café-au-lait macules	Noonan syndrome with multiple lentigines	PTPN11 c.1403C>T p.Thr468Met	Rankin et al. (2013)
9	NA/F	Pilocytic astrocytoma	NA	NA	Noonan syndrome	PTPN11 c.179G>C p.Gly60Ala	Kratz et al. (2015)
10	NA/F	Dysembryoplastic neuroepithelial tumor	NA	NA	Noonan syndrome	PTPN11 c.922A>G p.Asn308Asp	Kratz et al. (2015)
11	NA/M	Astrocytoma	NA	NA	KRAS syndrome	KRAS c.458A>T p.Asp153Val	Kratz et al. (2015)
12	14/M	Pilomyxoid astrocytoma	Optic nerve	Café-au-lait macules with possible affected first degree relative		PTPN11 c.417G>C p.Glu139Asp	Nair et al. (2015)
13	12/F	Rosette-forming glioneuronal tumor	4th ventricle	Failure to thrive, developmental delay, short stature, syndromic features, and cardiopathy	Noonan syndrome	PTPN11 c.923A>G p.Asn308Ser	Lin et al. (2016)
14	8/M	Dysembryoplastic neuroepithelial tumor (both tumors)	Temporal lobe and cerebellum*	Short stature, syndromic features, and cardiopathy	Noonan syndrome	PTPN11 c.417G>C p.Glu139Asp	McWilliams et al. (2016)
15	9.1/M	Diffuse leptomeningeal glioneuronal tumor	NA	Syndromic features, skin abnormalities, and cardiopathy	Cardiofaciocutaneous syndrome	RAF1 not specified	Dodgshun et al. (2016)
16	Newborn/F	Anaplastic astrocytoma	Hypothalamic	Multiple ocular and skin lesions (syringocystadenoma papilliferum)	Mosaic genodermatoses	BRAF c.1799T>A p.V600E	Watanabe et al. (2016)
17	9/M	Dysembryoplastic neuroepithelial tumor	Temporal lobe and cerebellum*	Short stature, syndromic features, cryptorchidism, Crohn's disease, and pancytopenia	Noonan syndrome	PTPN11 c.182A>G p.Asp61Gly	Bangalore Krishna et al. (2017)
18	15/M	Metastatic pilocytic astrocytoma	4th ventricle	Developmental delay, short stature, syndromic features, cardiopathy, and cryptorchidism	Noonan syndrome	PTPN11 c.922A>G p.Asn308Asp	Bangalore Krishna et al. (2017)
19	16/M	Dysembryoplastic neuroepithelial tumor	Temporofrontal lobes and thalamus*	Developmental delay, short stature, syndromic features, cardiopathy, and criptochirdism	Noonan syndrome	PTPN11 c.922A>G p.Asn308Asp	Siegfried et al. (2017)
20	5/M	Pilocytic astrocytoma	Suprasellar	Multiple soft tissue masses and eye dermoid	Encephalocraniocutaneous lipomatosis (mosaic)	FGFR1 c.1966A>G p.K656E	Bavle et al. (2018)
21	14/F	Anaplastic astrocytoma WHO grade 3	Brainstem and cerebellar peduncle	Developmental delay, syndromic features, and delayed puberty	Noonan syndrome	PTPN11 c.922 A > G p.N308D	El-Ayadi et al. (2019)
22	9/M	Anaplastic pilocytic astrocytoma by DNA methylation	Third ventricle, cerebellum, and fornix	Developmental delay and syndromic features	Noonan syndrome	PTPN11 c.5C > T p.T2I	El-Ayadi et al. (2019)
23	NA	Rosette-forming glioneuronal tumor	NA	NA	Noonan syndrome	NA	Sievers et al. (2019)
24	15/M	Pilocytic astrocytoma (WHO grade 1)	Metastatic and multifocal (temporal and occipital lobes and other areas)*	Developmental delay, nevus sebaceous, and dermoid in eye	Linear nevus sebaceous syndrome (mosaic)	NA	Chiang et al. (2019)
25	9/F	Glioneuronal neoplasm (WHO grade 1) - suprasellar tumor Pilocytic astrocytoma (WHO grade 1; cerebellum)	Temporal and frontal lobes, suprasellar area, and cerebellum*	Developmental delay, short stature, syndromic features, cardiopathy, and affected first degree relative	Noonan syndrome	PTPN11 c.922A>G p.N308D	Lodi et al. (2020)
26	22/M	IDH1-mutated oligoastrocytoma	Frontal and temporal lobes, and insula	Short stature, syndromic features, cryptorchidism, chest deformity, bleeding diathesis, and affected first degree relative	Noonan syndrome	LTZR1 c.850C > T p.R284C	Jacquinet et al. (2020)
27	49/M	Intracerebral malignant peripheral nerve sheath tumor by DNA methylation	Frontal lobe	Cardiopathy	Noonan syndrome	NA	Allison et al. (2021)
28	12/F	Glioblastoma WHO grade 4	Spinal cord T10 through L1 + small thalamic lesion	NA	Noonan syndrome	PTPN11 E139D	Khan et al. (2021)
29	9/M	Dysembryoplastic neuroepithelial tumor (both tumors)	Temporal lobe and cerebellum*	Cardiopathy, tethered cord, intestinal malrotation	Noonan syndrome	PTPN11 c.182A>G Asp61Gly	Tuohy et al. (2022)
30	NA/M	Rosette-forming glioneuronal tumor	Posterior fossa	Cardiopathy and bleeding diathesis	Noonan sysndrome	NA	Saragosti et al. (2023)
31	NA/F	Not biopsied	Tectum	Cardiopathy	Noonan syndrome	NA	Saragosti et al. (2023)
32	14/F	Glioblastoma WHO grade 4	Temporal and frontal lobes	Cardiopathy	Noonan syndrome	PTPN11 not specified	Boufricka et al. (2023)
33	22/M	Rosette-forming glioneuronal tumor	Suprasellar	Short stature, syndromic features, cryptorchidism, cardiopathy, and bleeding diathesis	Noonan syndrome	PTPN11 c.179G>C p.G60A	Shatara et al. (2024)
34	19/M	Rosette-forming glioneuronal tumor	Pineal region, thalami, and midbrain	Developmental delay, short stature, and syndromic features	Noonan syndrome	PTPN11 c.922A>G p.N308D	Shatara et al. (2024)
35	9/F	Diffuse leptomeningeal glioneuronal tumor	Diffuse tumor involvement	Developmental delay, short stature, syndromic features, and cardiopathy	Noonan syndrome	PTPN11 c.209A>G p.K70R	Shatara et al. (2024)
36	18/M	Low-grade glioneuronal tumor	Thalamus	Developmental delay, short stature, cryptorchidism, and cardiopathy	Noonan syndrome	PTPN11 c.922A>G p.N308D	Shatara et al. (2024)
37	16/M	Dysembryoplastic neuroepithelial tumor	Parietal lobe	Short stature, syndromic features, and criptochirdism	Noonan syndrome	PTPN11 c.174C>A p.N58K and EGFR inactivating variant	Shatara et al. (2024)
38	17/M	High-grade astrocytoma with piloid features	Spine cord C6 through L1	Developmental delay, hearing loss, and criptochirdism	Noonan syndrome	PTPN11 c.218C>T p.T73I	Staunton et al. (2024)
39	11.5/M	Dysembryoplastic neuroepithelial tumor	Frontal-insular lobe	Developmental delay, short stature, syndromic features, and chest deformity	Noonan Syndrome	PTPN11 c.1507G>A p.G503R	Pellicciari et al. (2025)
Abbreviations: F, female; M, male; L, lumbar; NA, not available; T, thoracic
Somatic molecular abnormalities were reported in the brain tumor in patients 13, 22, 23, 28, and 33-38
Patients 14, 15, 17, 18, 21, 24, and 29 have been included in our series
* Patients 14, 17, 19, 24, 25, 29, and 37 had multifocal tumors
