# Supplementary material for: PTPN11-related Noonan syndrome predisposes to multifocal low-grade CNS tumors harboring FGFR1 variants
Source: J Neurooncol. 2026 Mar 5;177(1):31. doi: 10.1007/s11060-026-05478-7 (PMC12963110; doi:10.1007/s11060-026-05478-7)
Supplement: Supplementary file 5 — Supplementary Material 5 [file 11060_2026_5478_MOESM5_ESM.xlsx]

## Sheet: Sheet1
PTPN11 Genotypes and Incidence
Previous Published Data (Tartaglia et al., 2002)		Current Manuscript Data and 95% Confidence Interval
NM_002834.5(PTPN11):c.182A>G (p.Asp61Gly)	2/54= 0.04	3/17= 0.18	(0.04, 0.43)
NM_002834.5(PTPN11):c.236A>G (p.Gln79Arg)	5/54= 0.09	1/17= 0.06	(0, 0.29)
NM_002834.5(PTPN11):c.417G>C (p.Glu139Asp)	2/54= 0.04	3/17= 0.18	(0.04, 0.43)
NM_002834.5(PTPN11):c.923A>G (p.Asn308Ser)	2/54= 0.04	1/17= 0.06	(0, 0.29)
NM_002834.5(PTPN11):c.922A>G (p.Asn308Asp)	17/54= 0.31	2/17= 0.12	(0.02, 0.36)
NM_002834.5(PTPN11):c.1510A>G (p.Met504Val)	3/54= 0.06	2/17= 0.12	(0.02, 0.36)
